# Supplementary material
Source: bioRxiv or medRxiv preprint supplement (https://www.biorxiv.org/highwire/filestream/87818/field_highwire_adjunct_files/0/285585-1.pdf)

## Supplementary Figures

Figure S1. Registration QC: Mean and standard deviation of anatomical and mean functional images

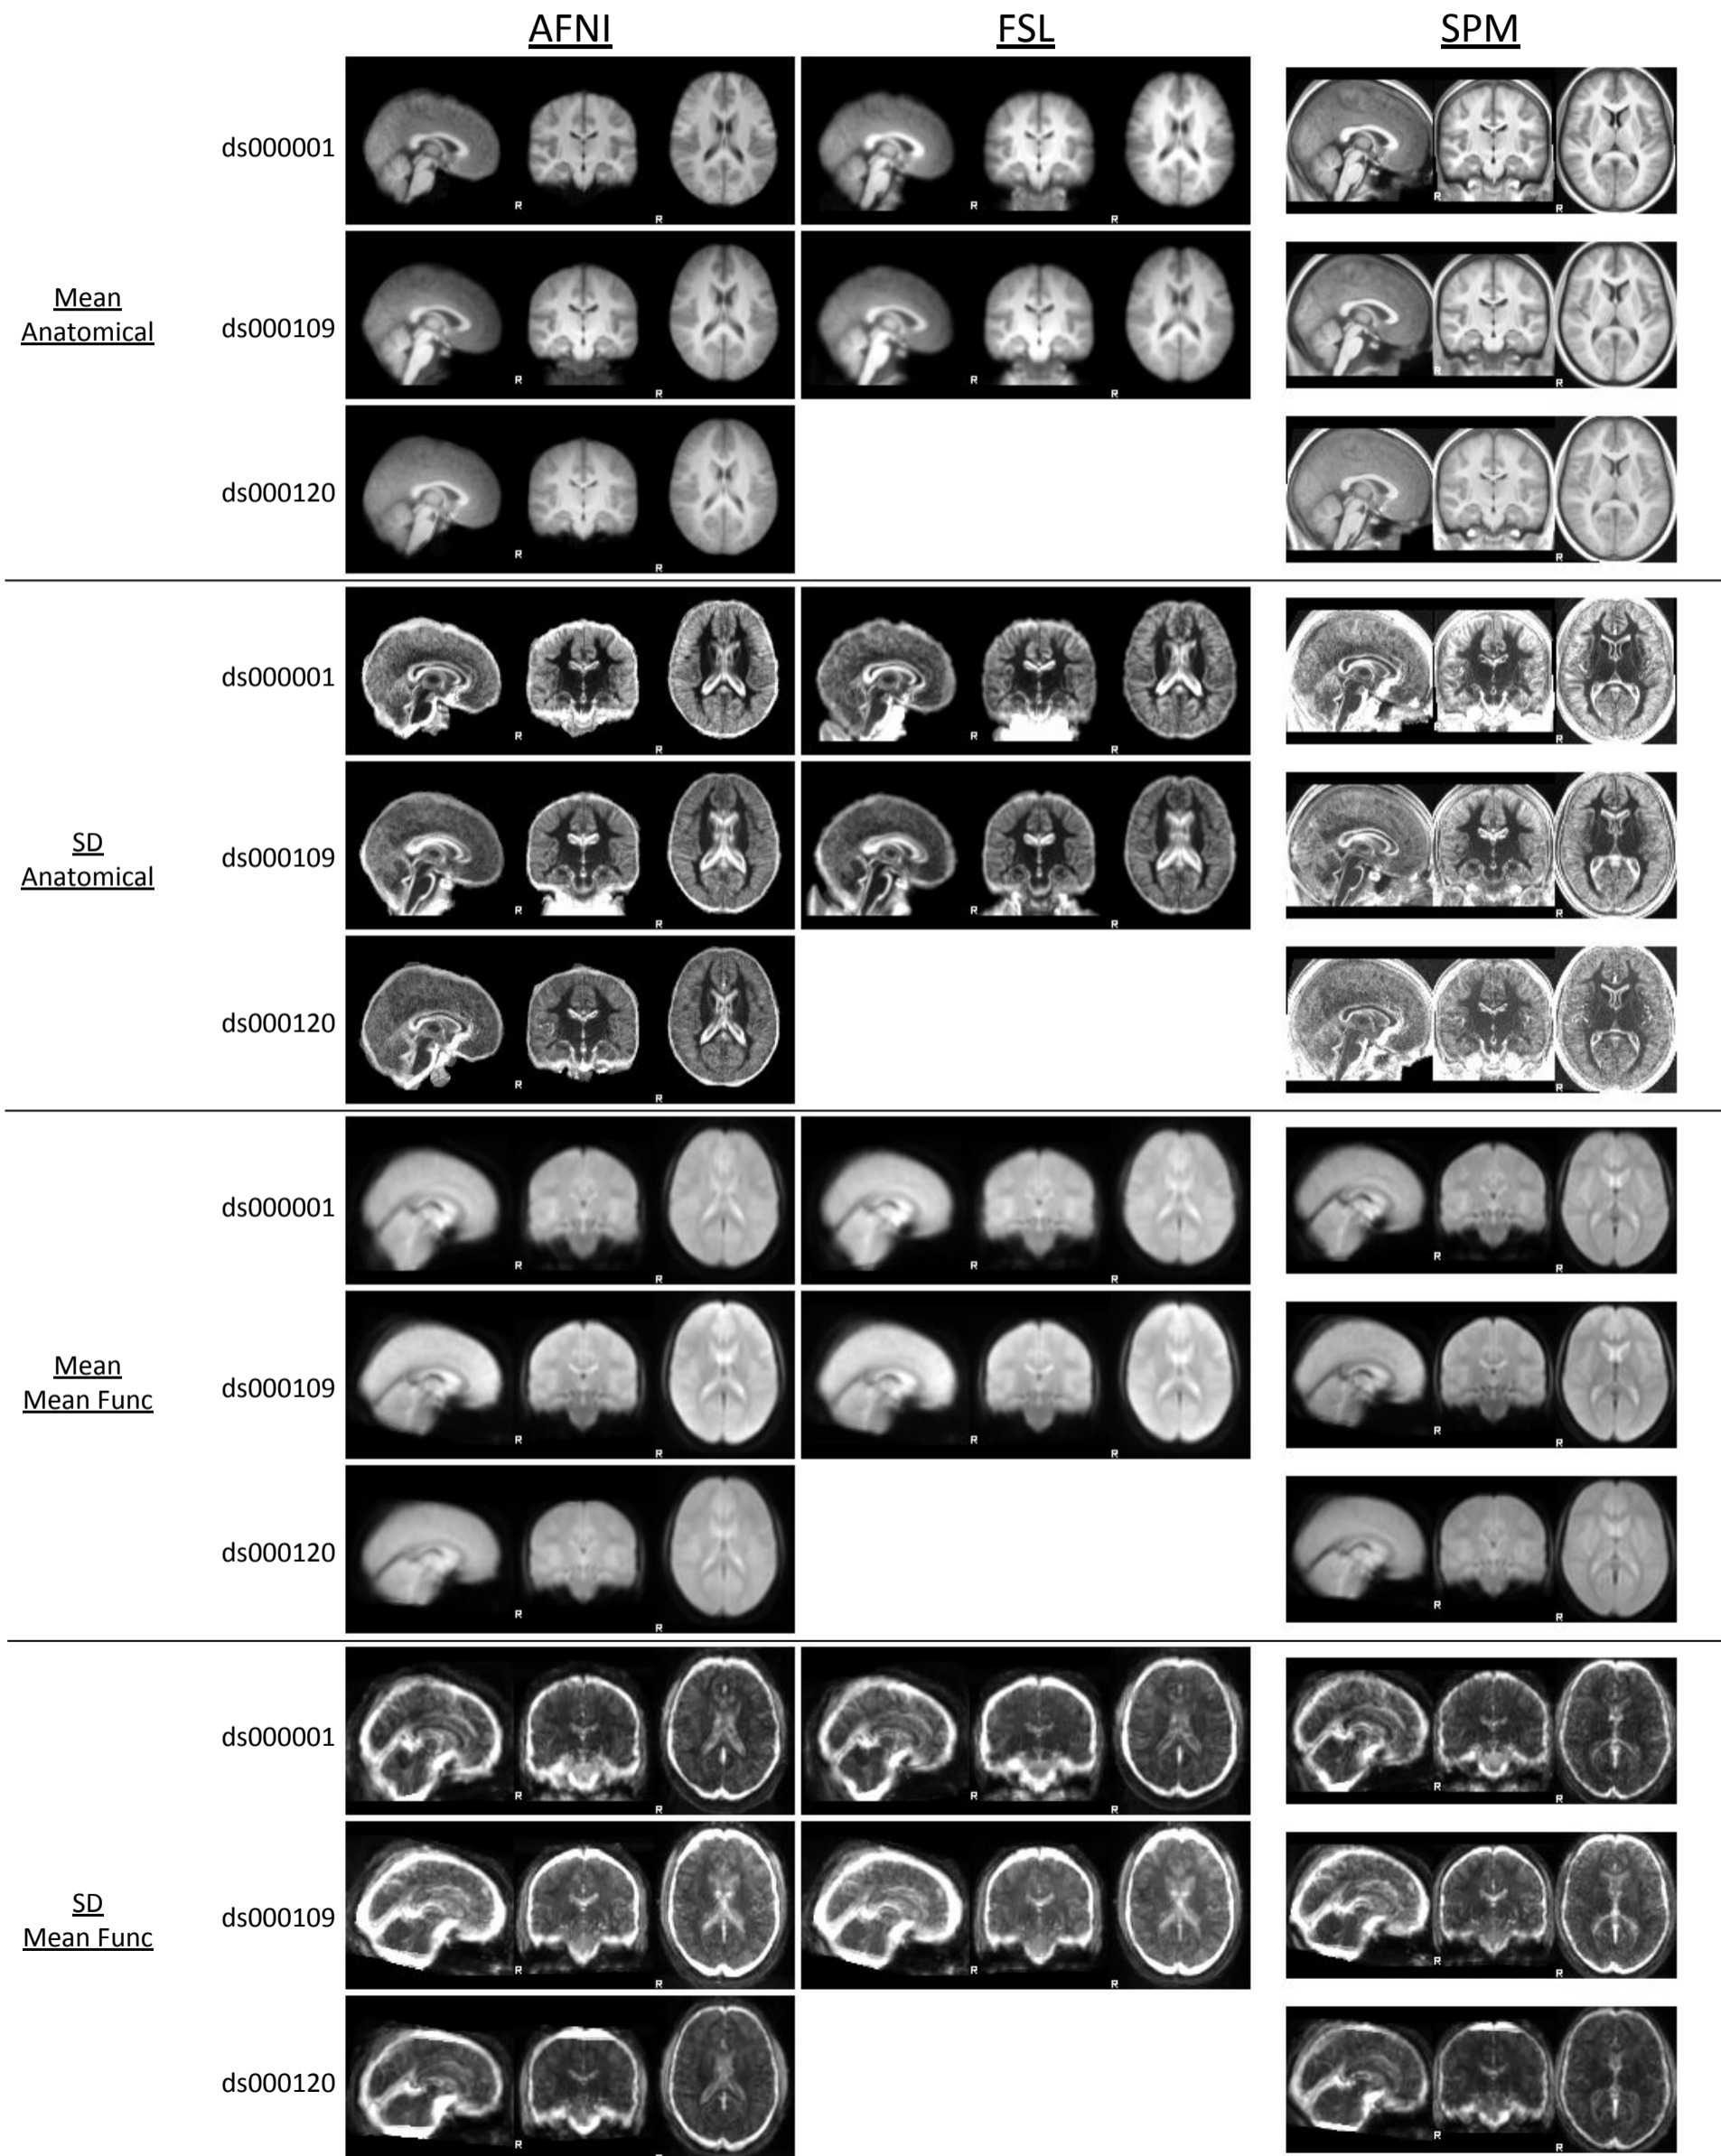

Figure S2. ds000001 Inter-Software Comparison, 5% FWE Clusterwise Inference

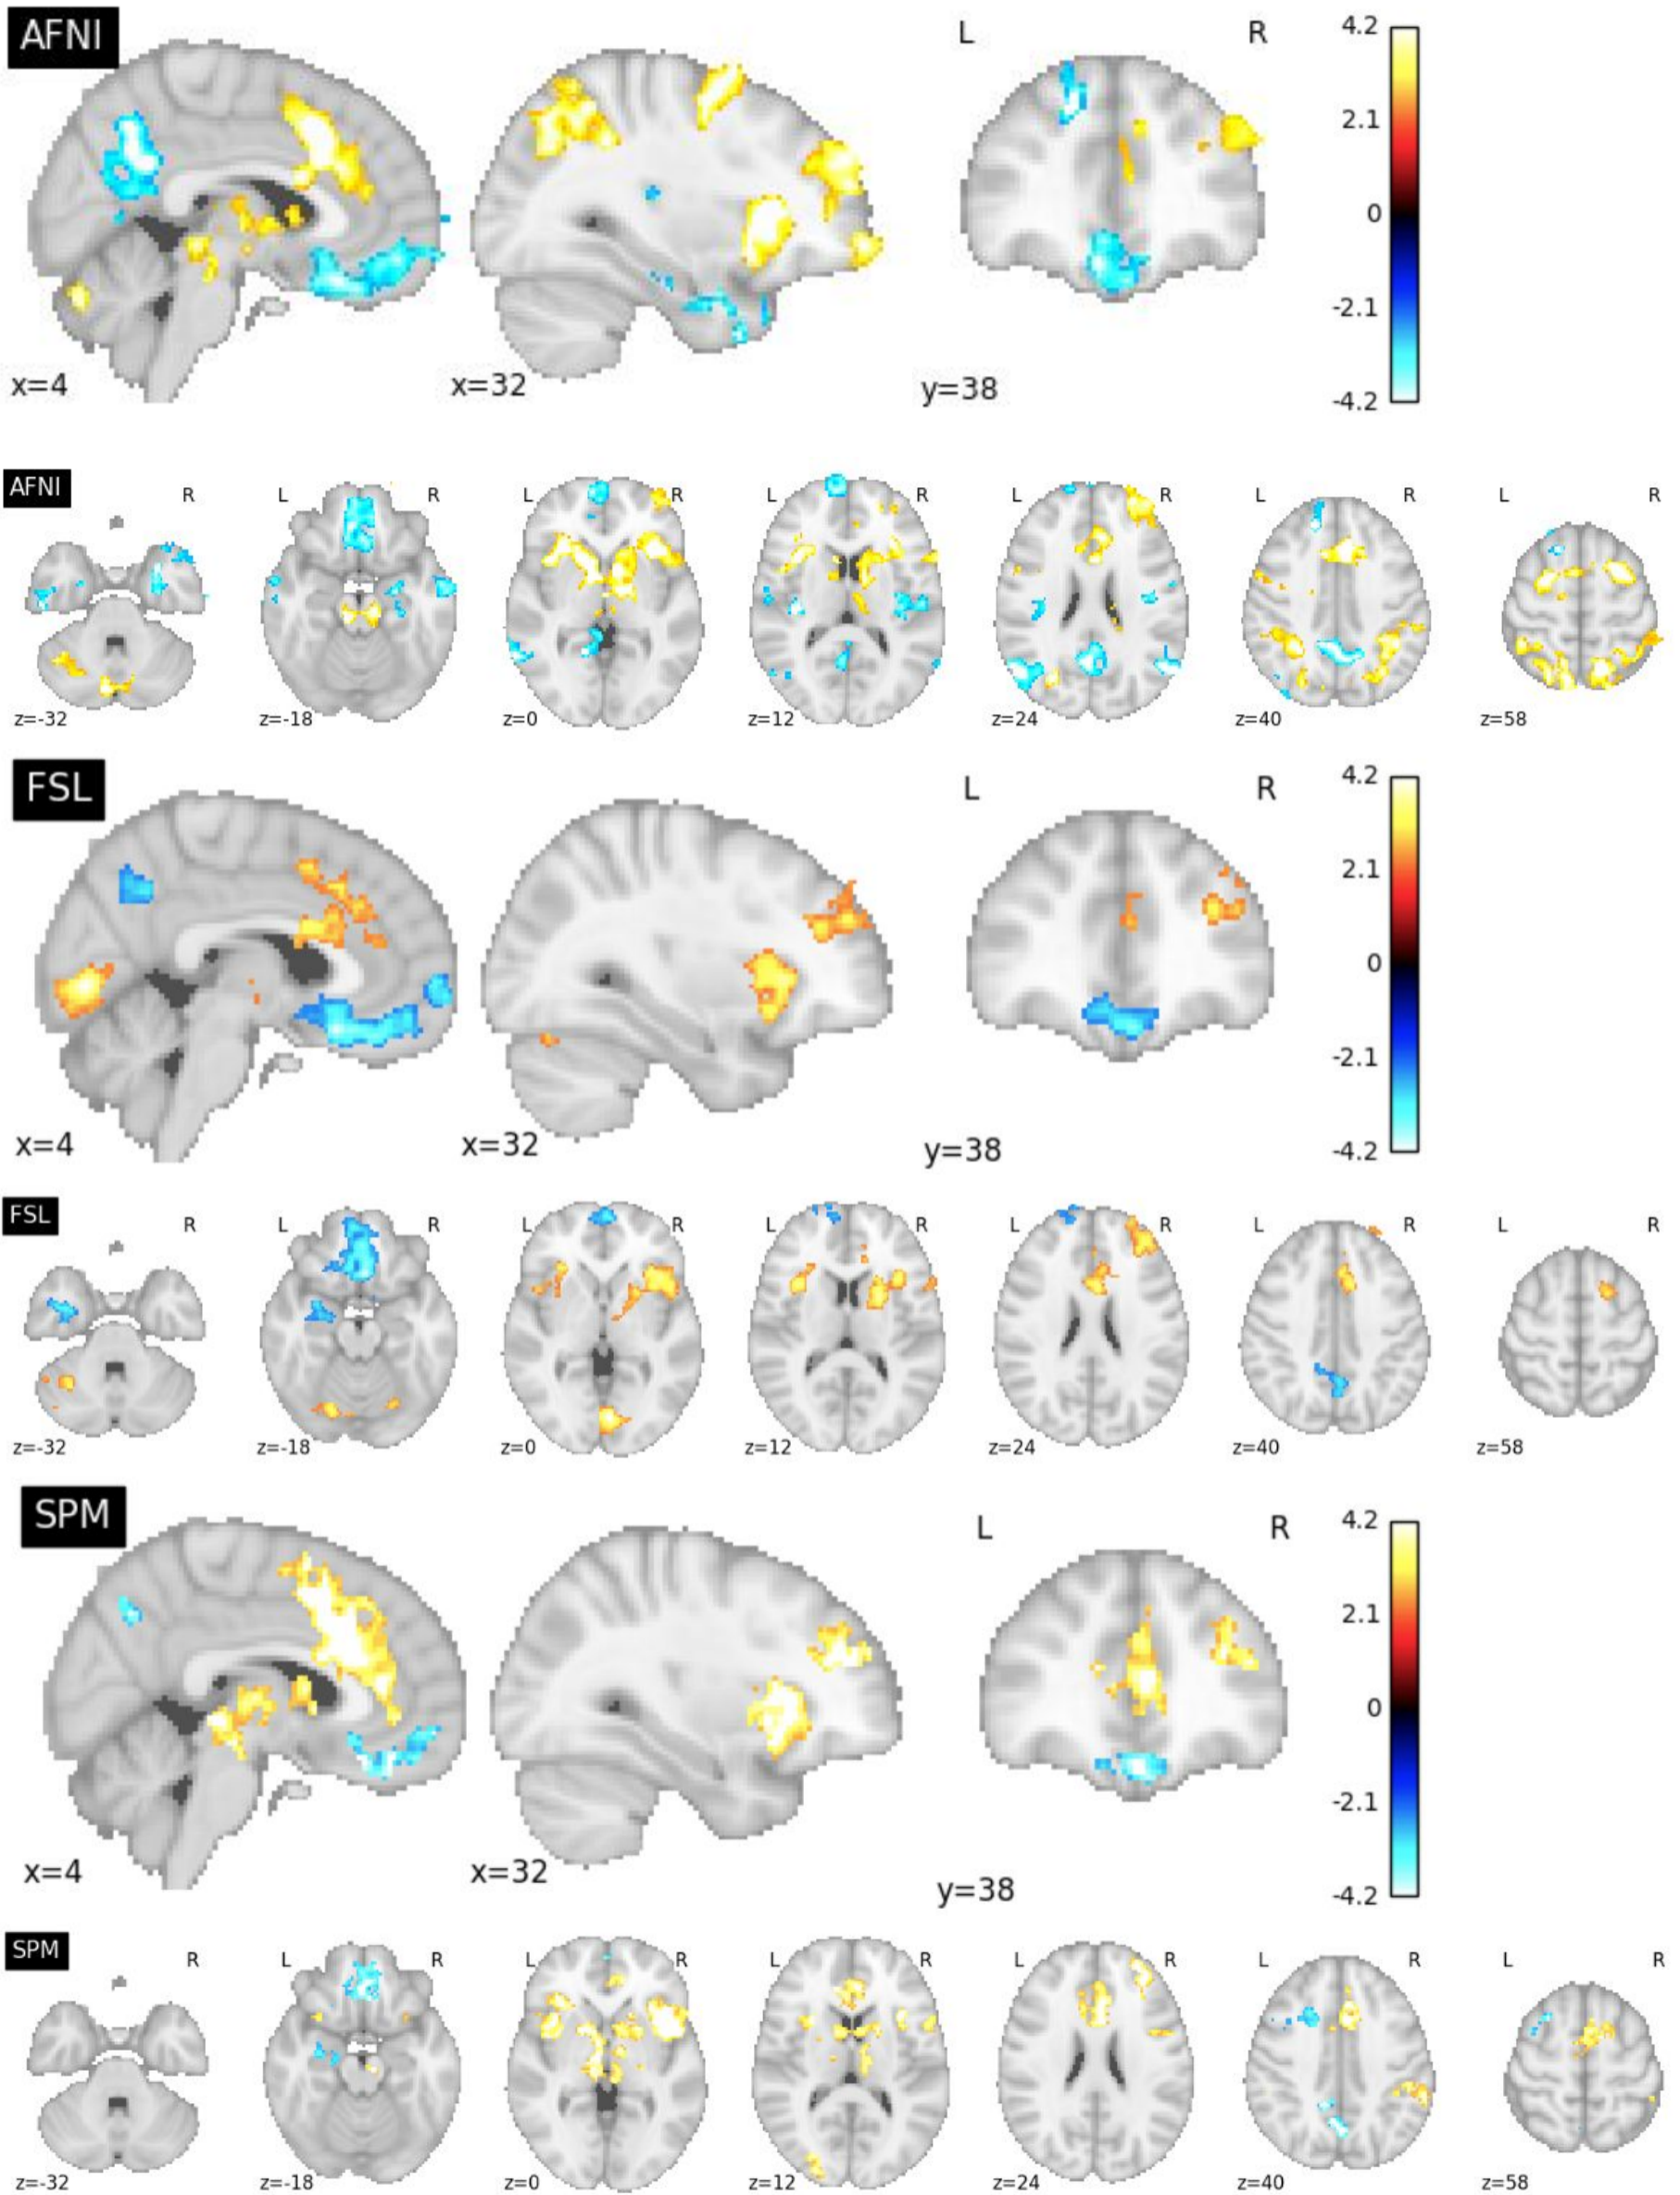

Figure S3. ds000001 Inter-Software Comparison, 5% FWE Clusterwise Permutation Inference

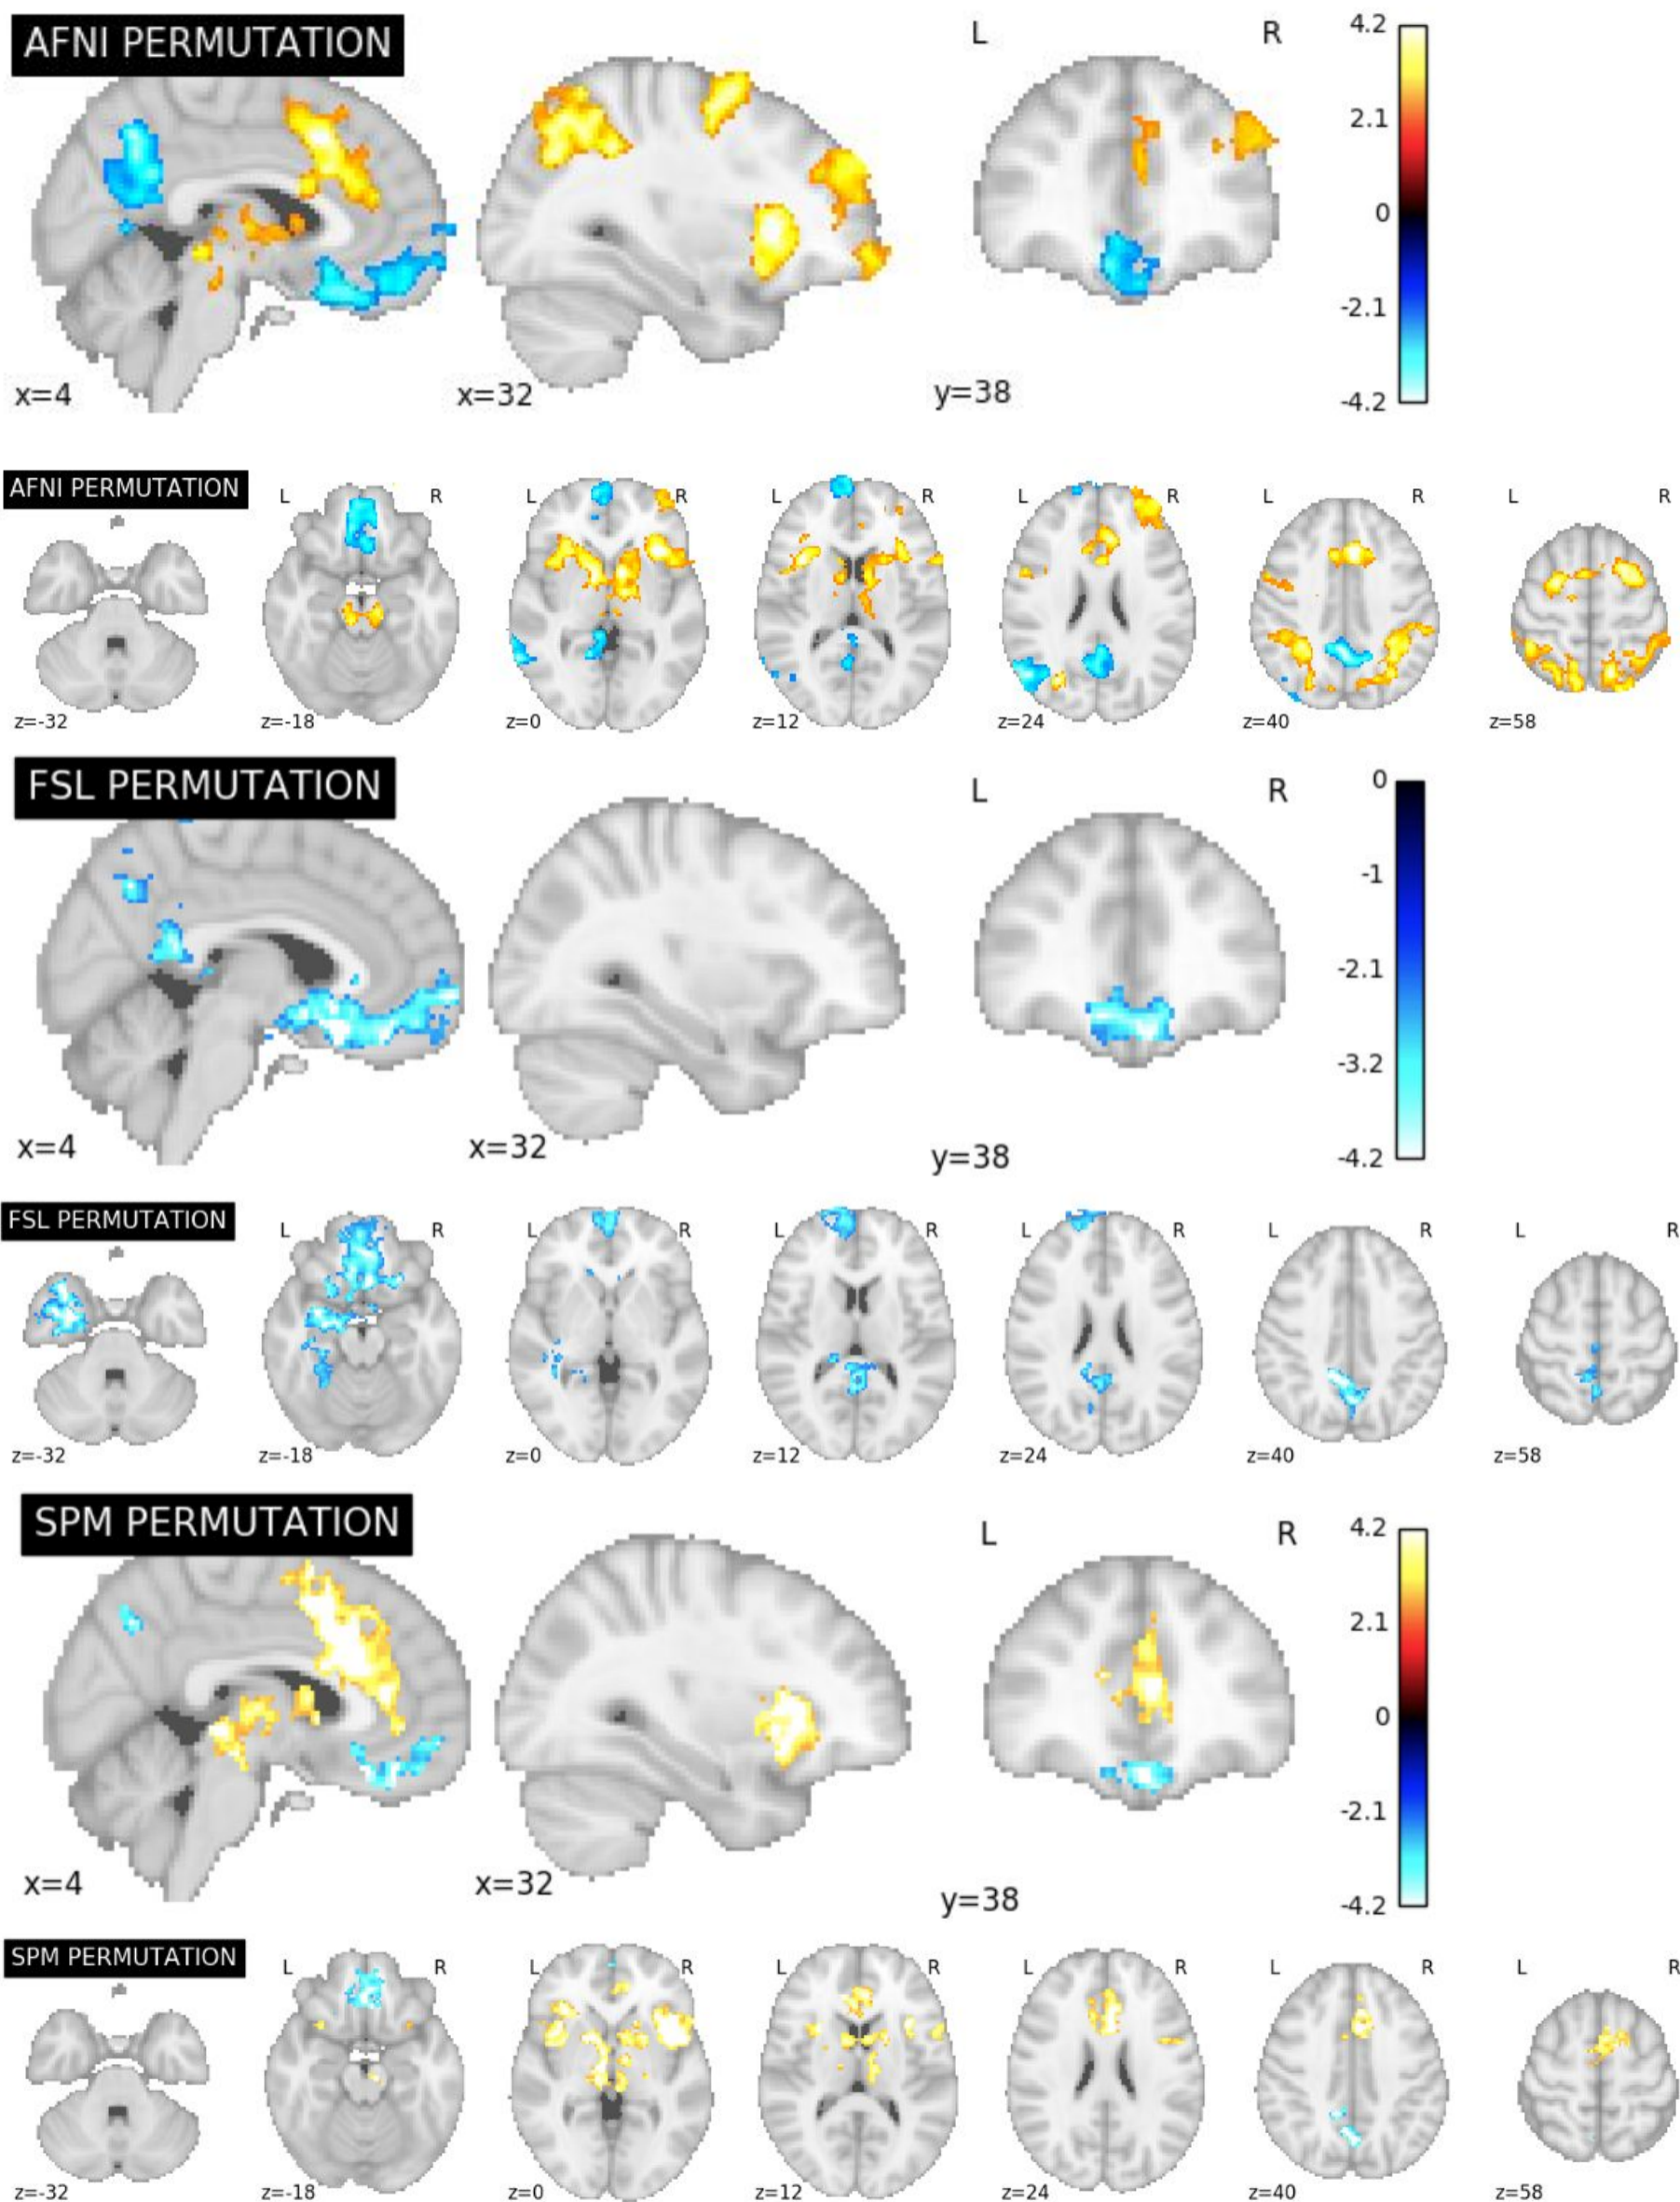

Figure S4. ds000109 Inter-Software Comparison, 5% FWE Clusterwise Inference

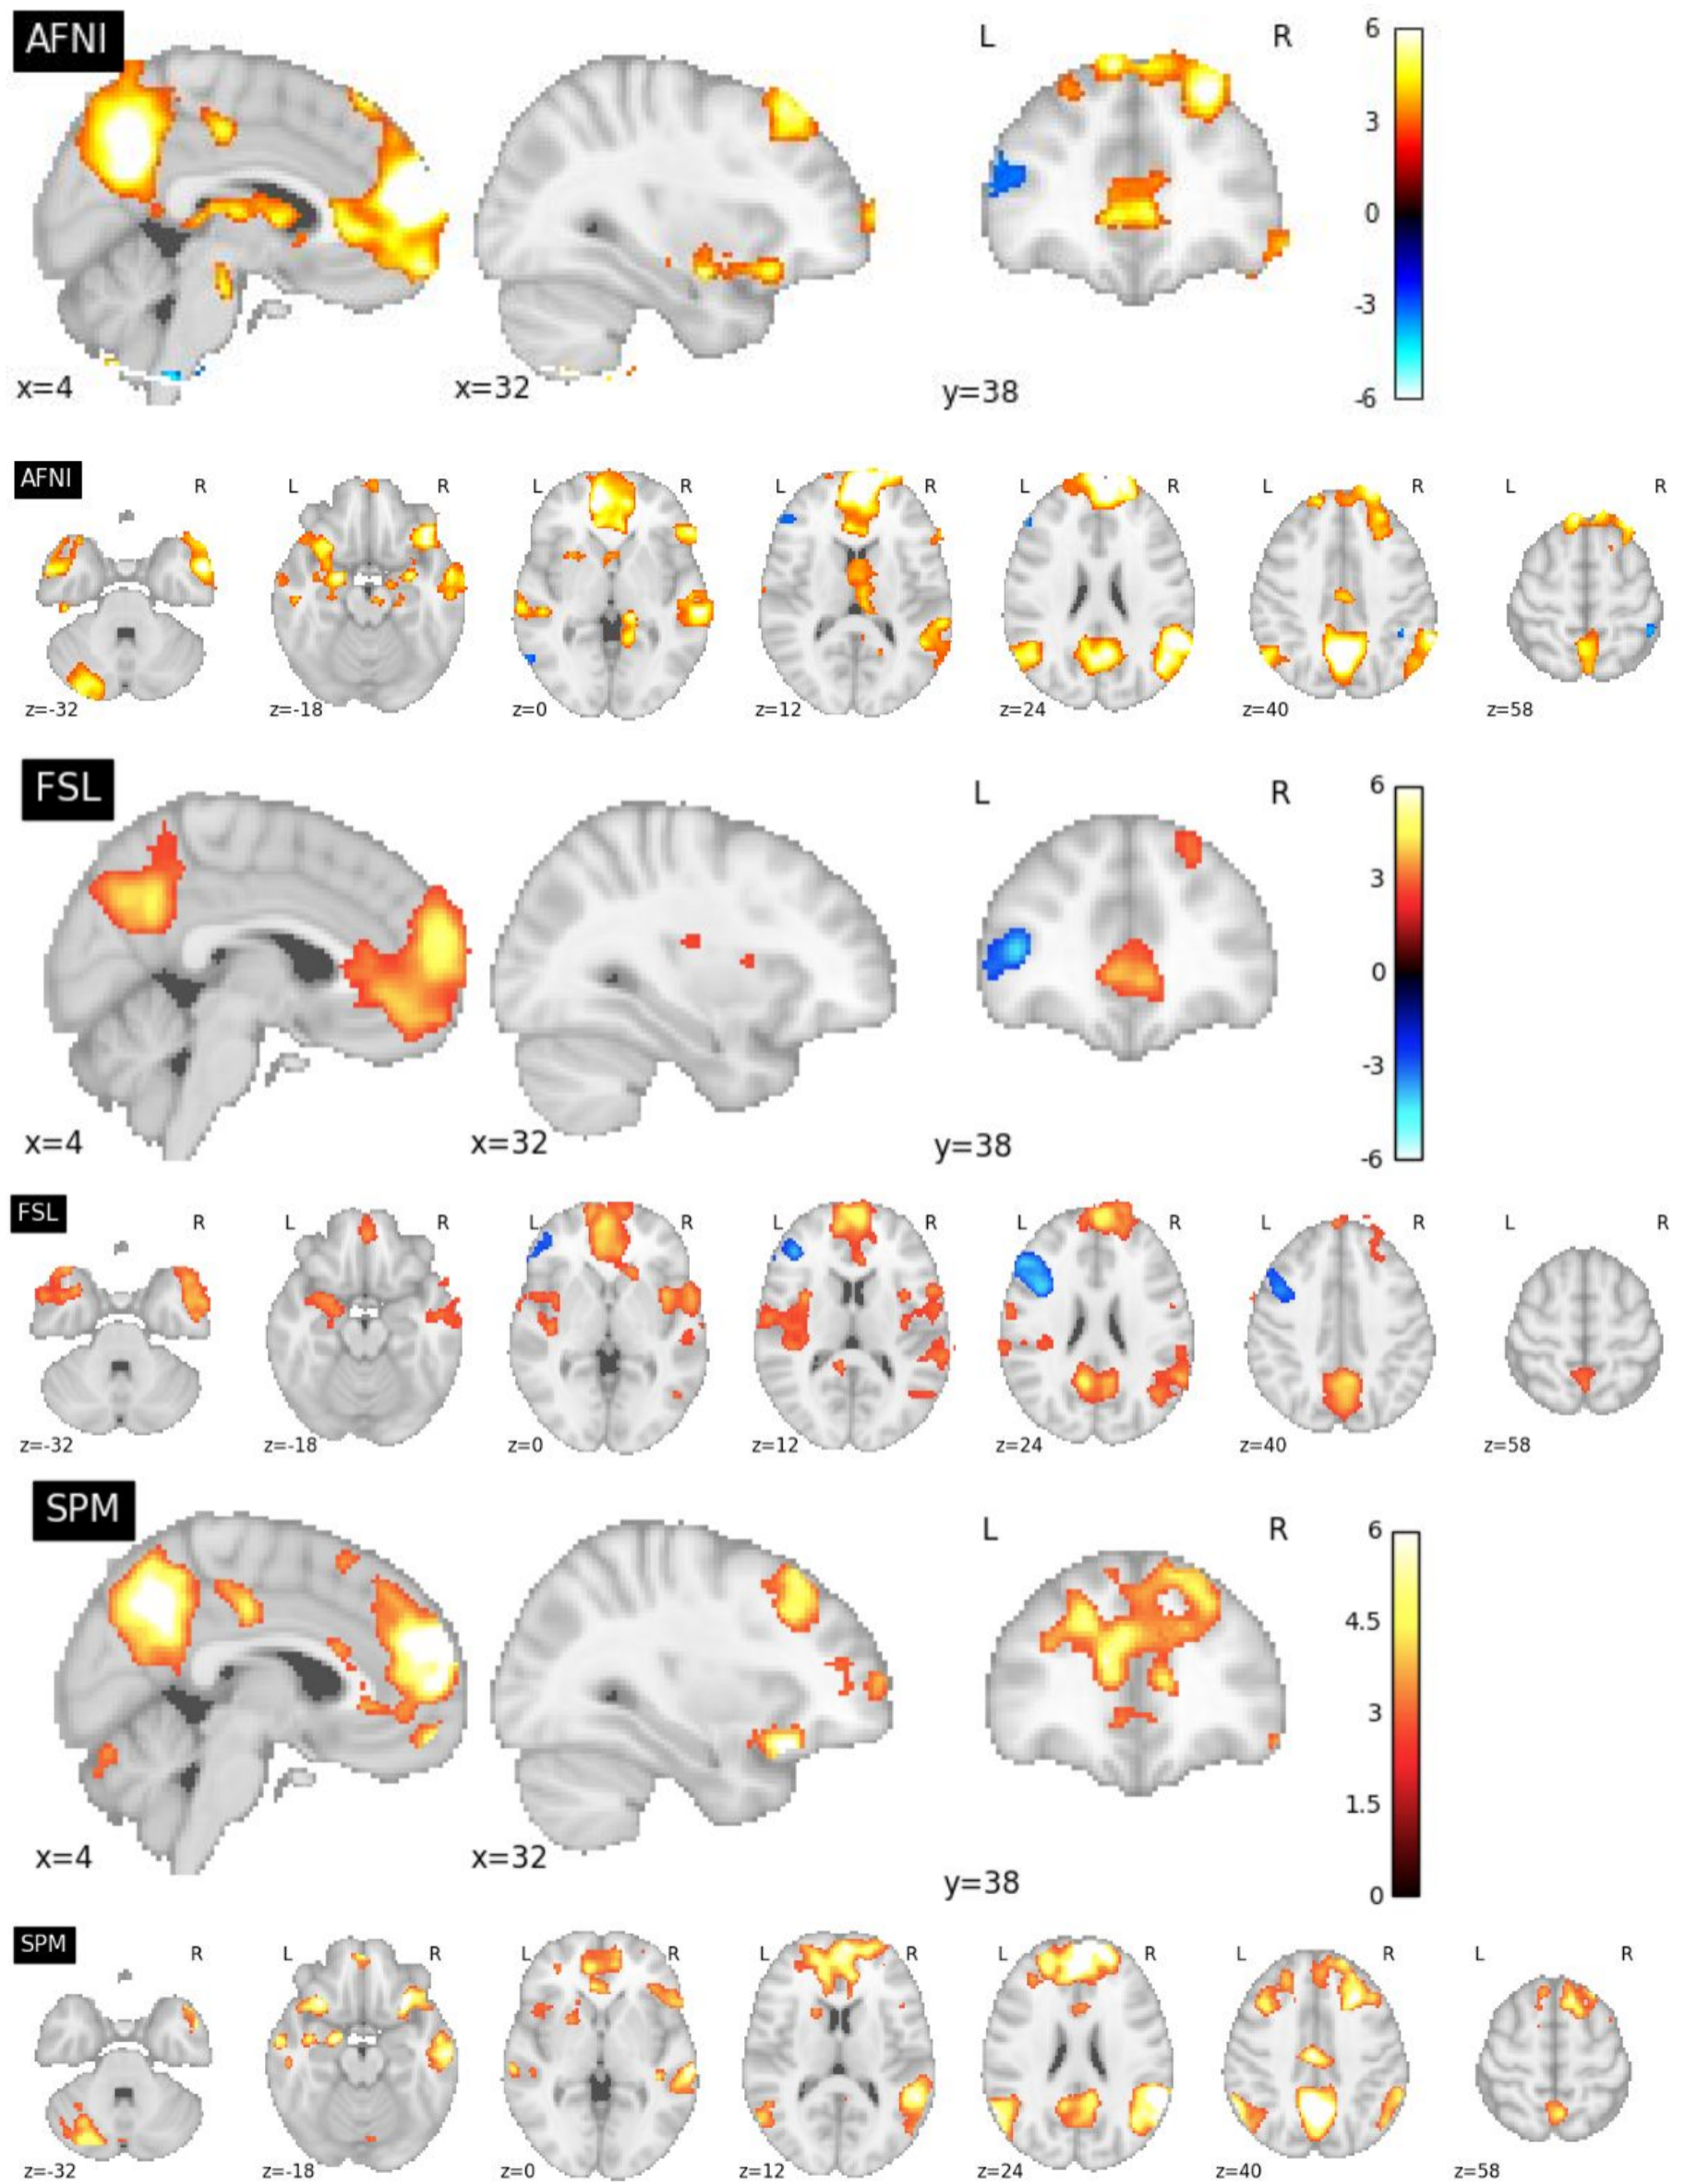

Figure S5. ds000109 Inter-Software Comparison, 5% FWE Clusterwise Permutation Inference

**AFNI PERMUTATION**

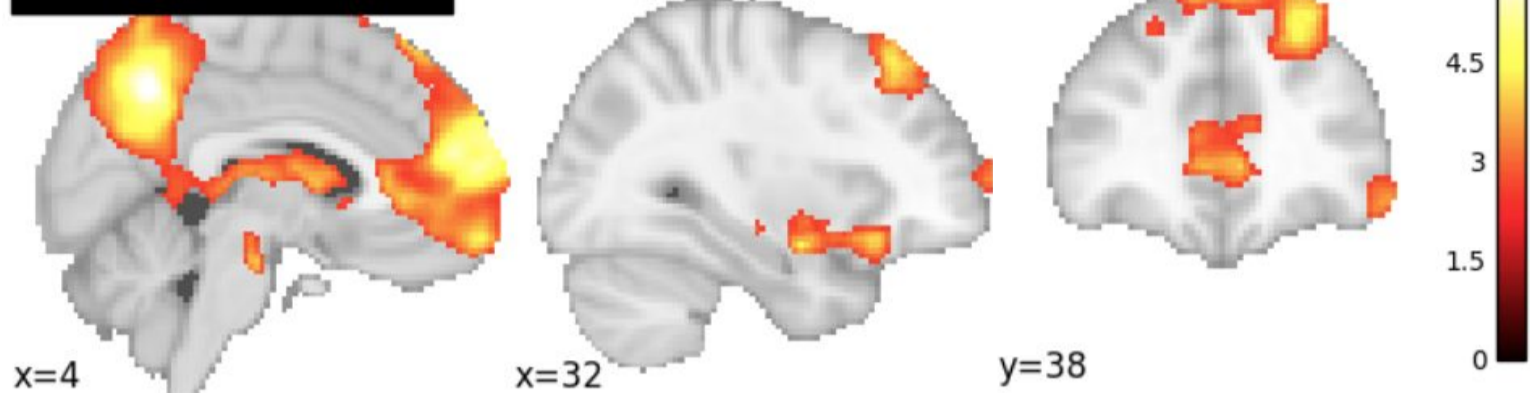

**AFNI PERMUTATION**

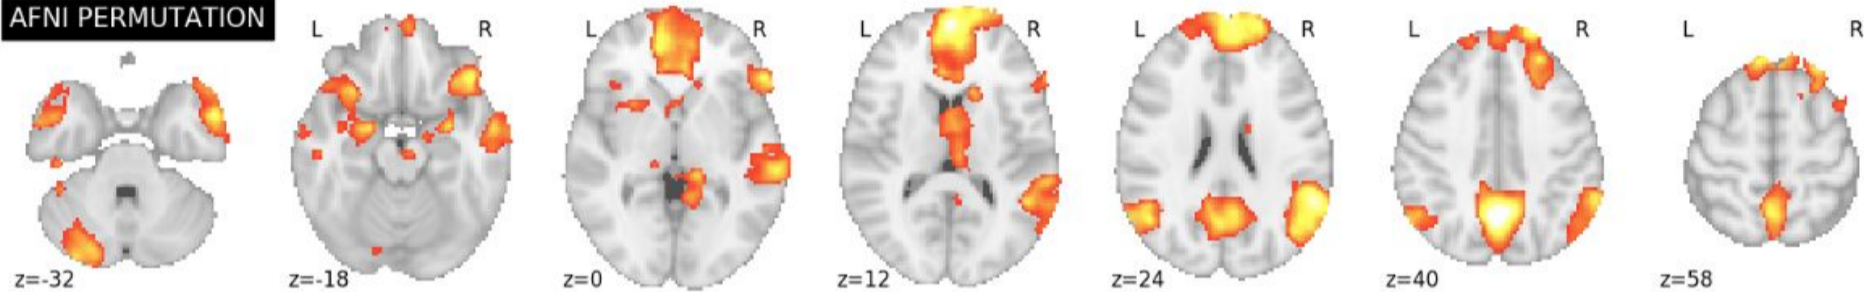

**FSL PERMUTATION**

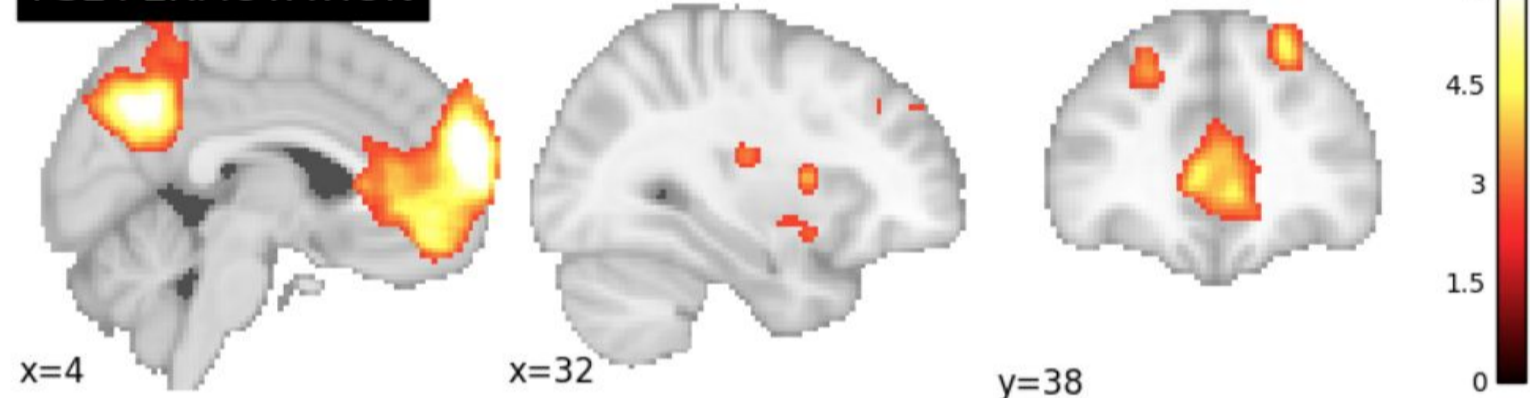

**FSL PERMUTATION**

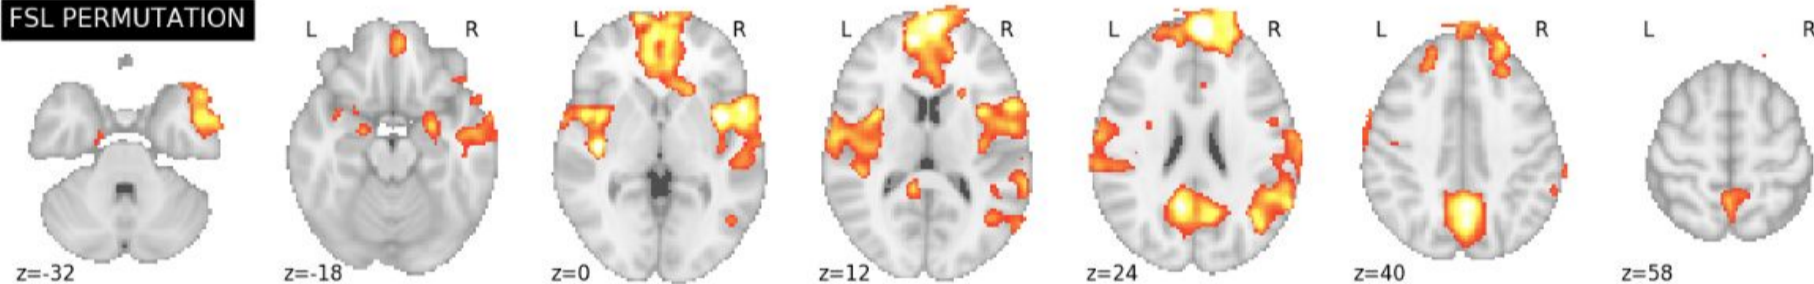

**SPM PERMUTATION**

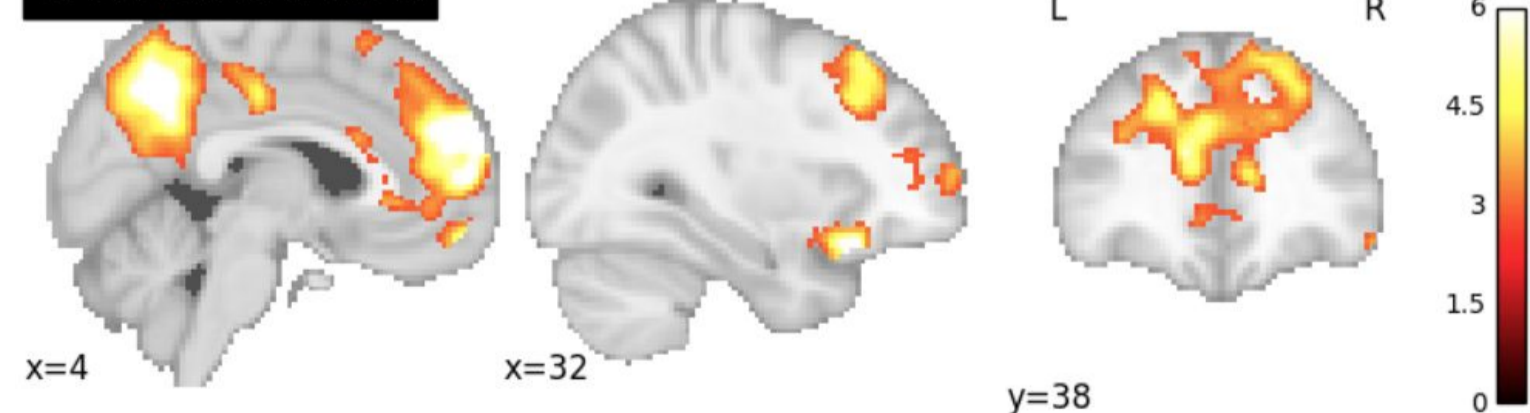

**SPM PERMUTATION**

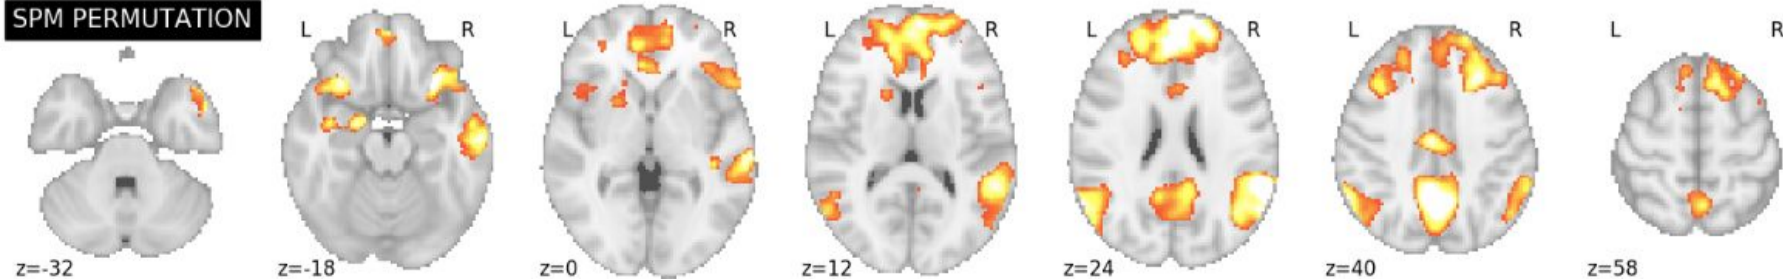

Figure S6. ds000120 Inter-Software Comparison, 5% FWE Clusterwise Inference

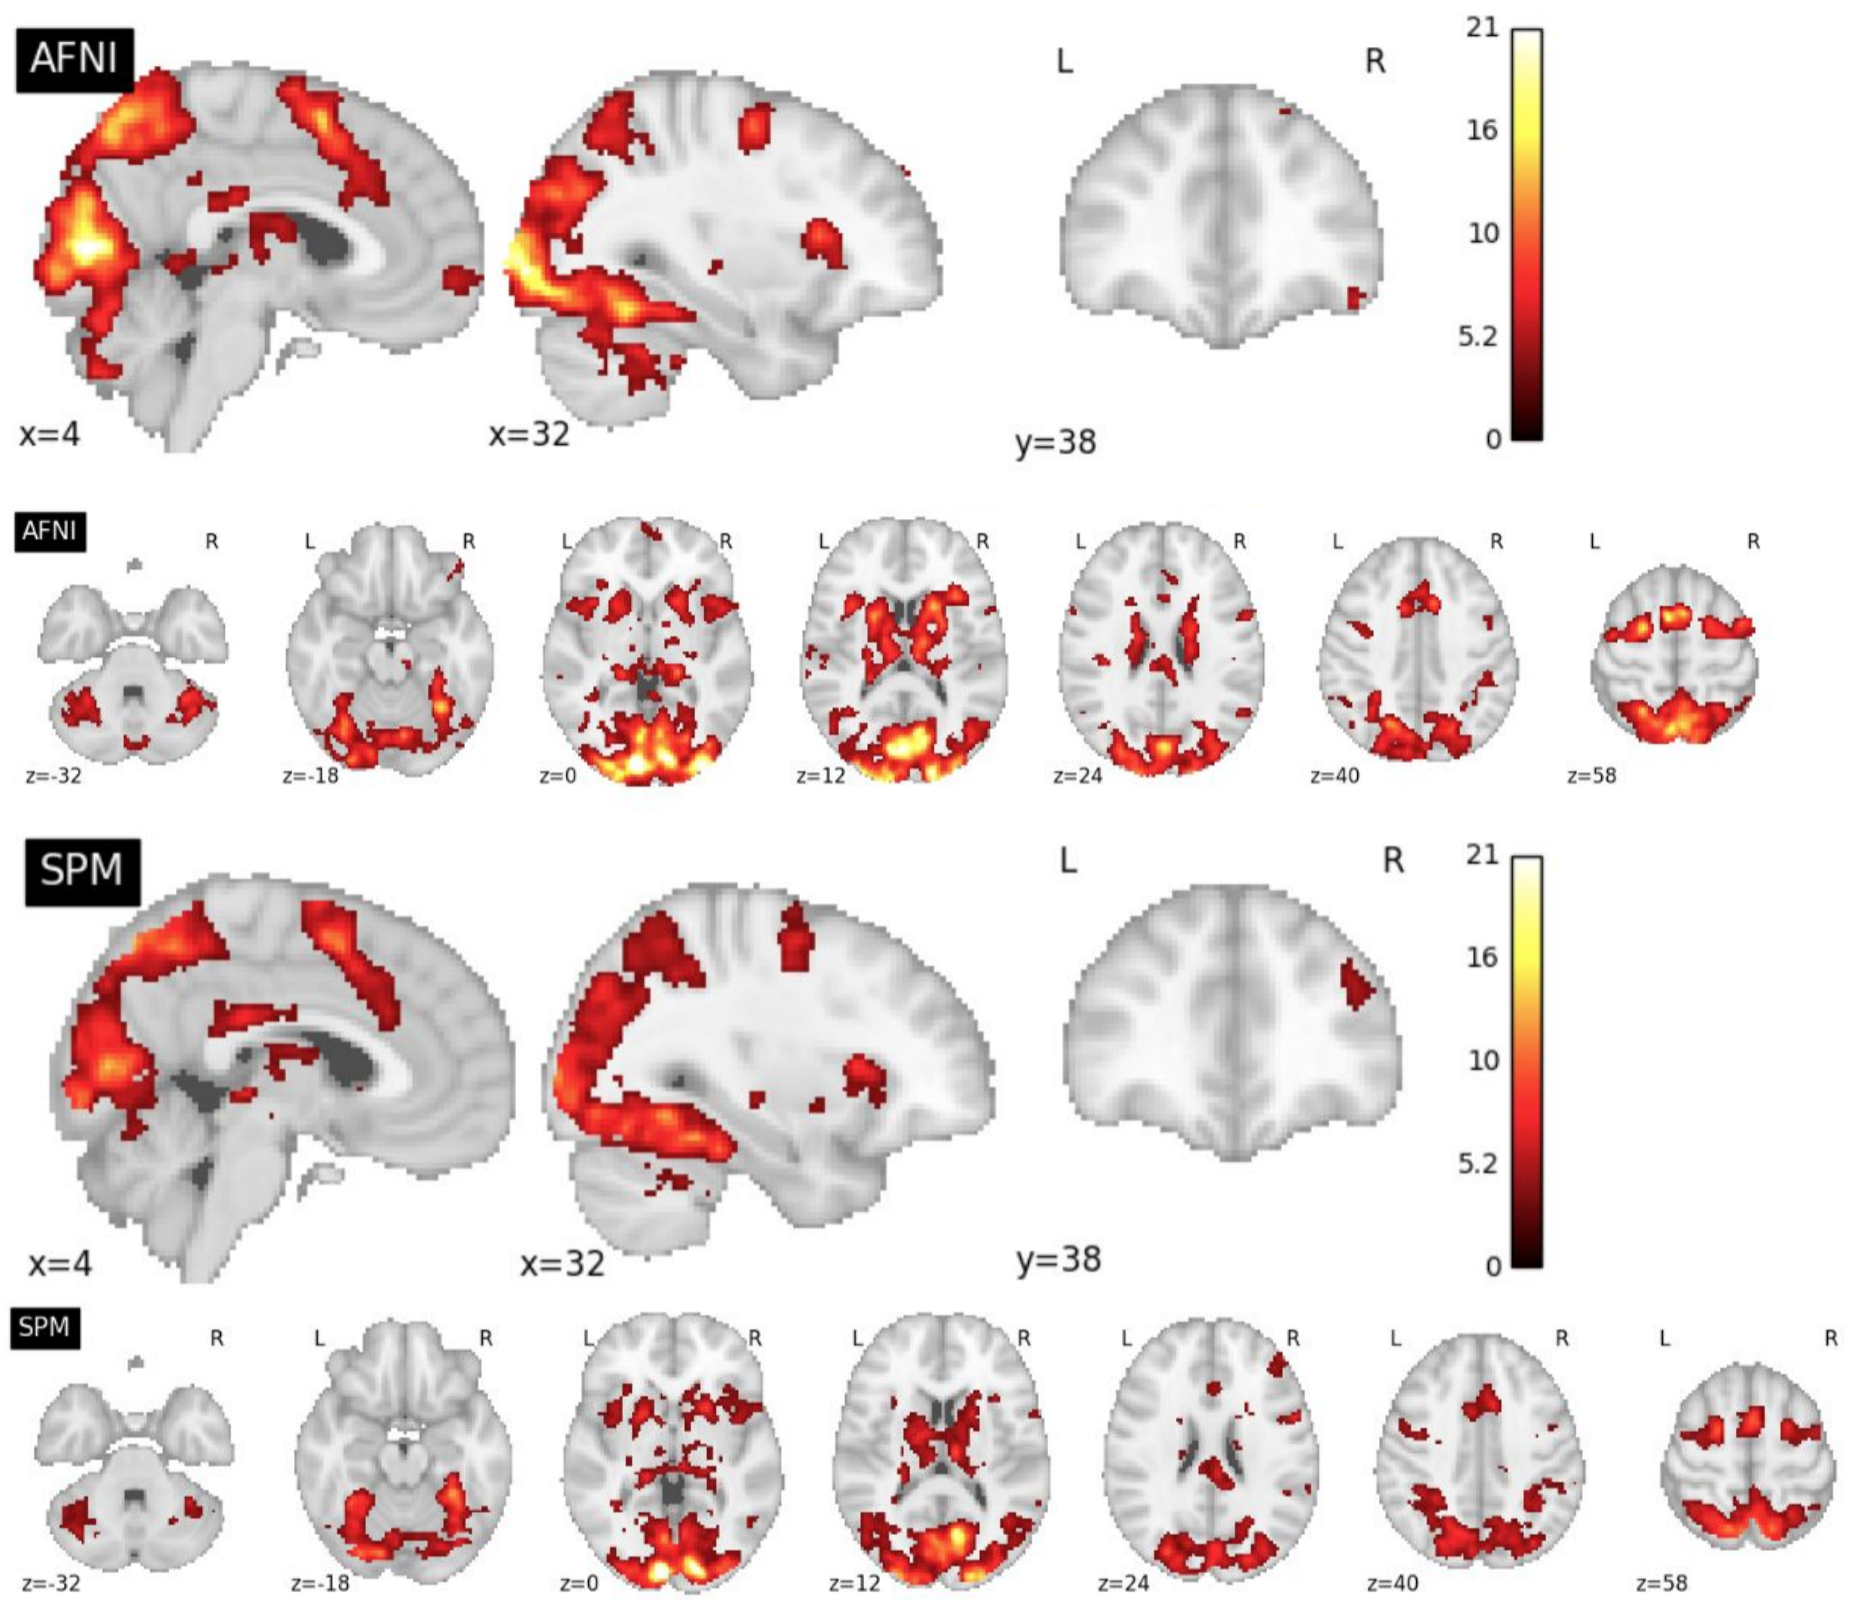

Figure S7. ds000001 Inter-Software Comparison, T-Statistic Maps

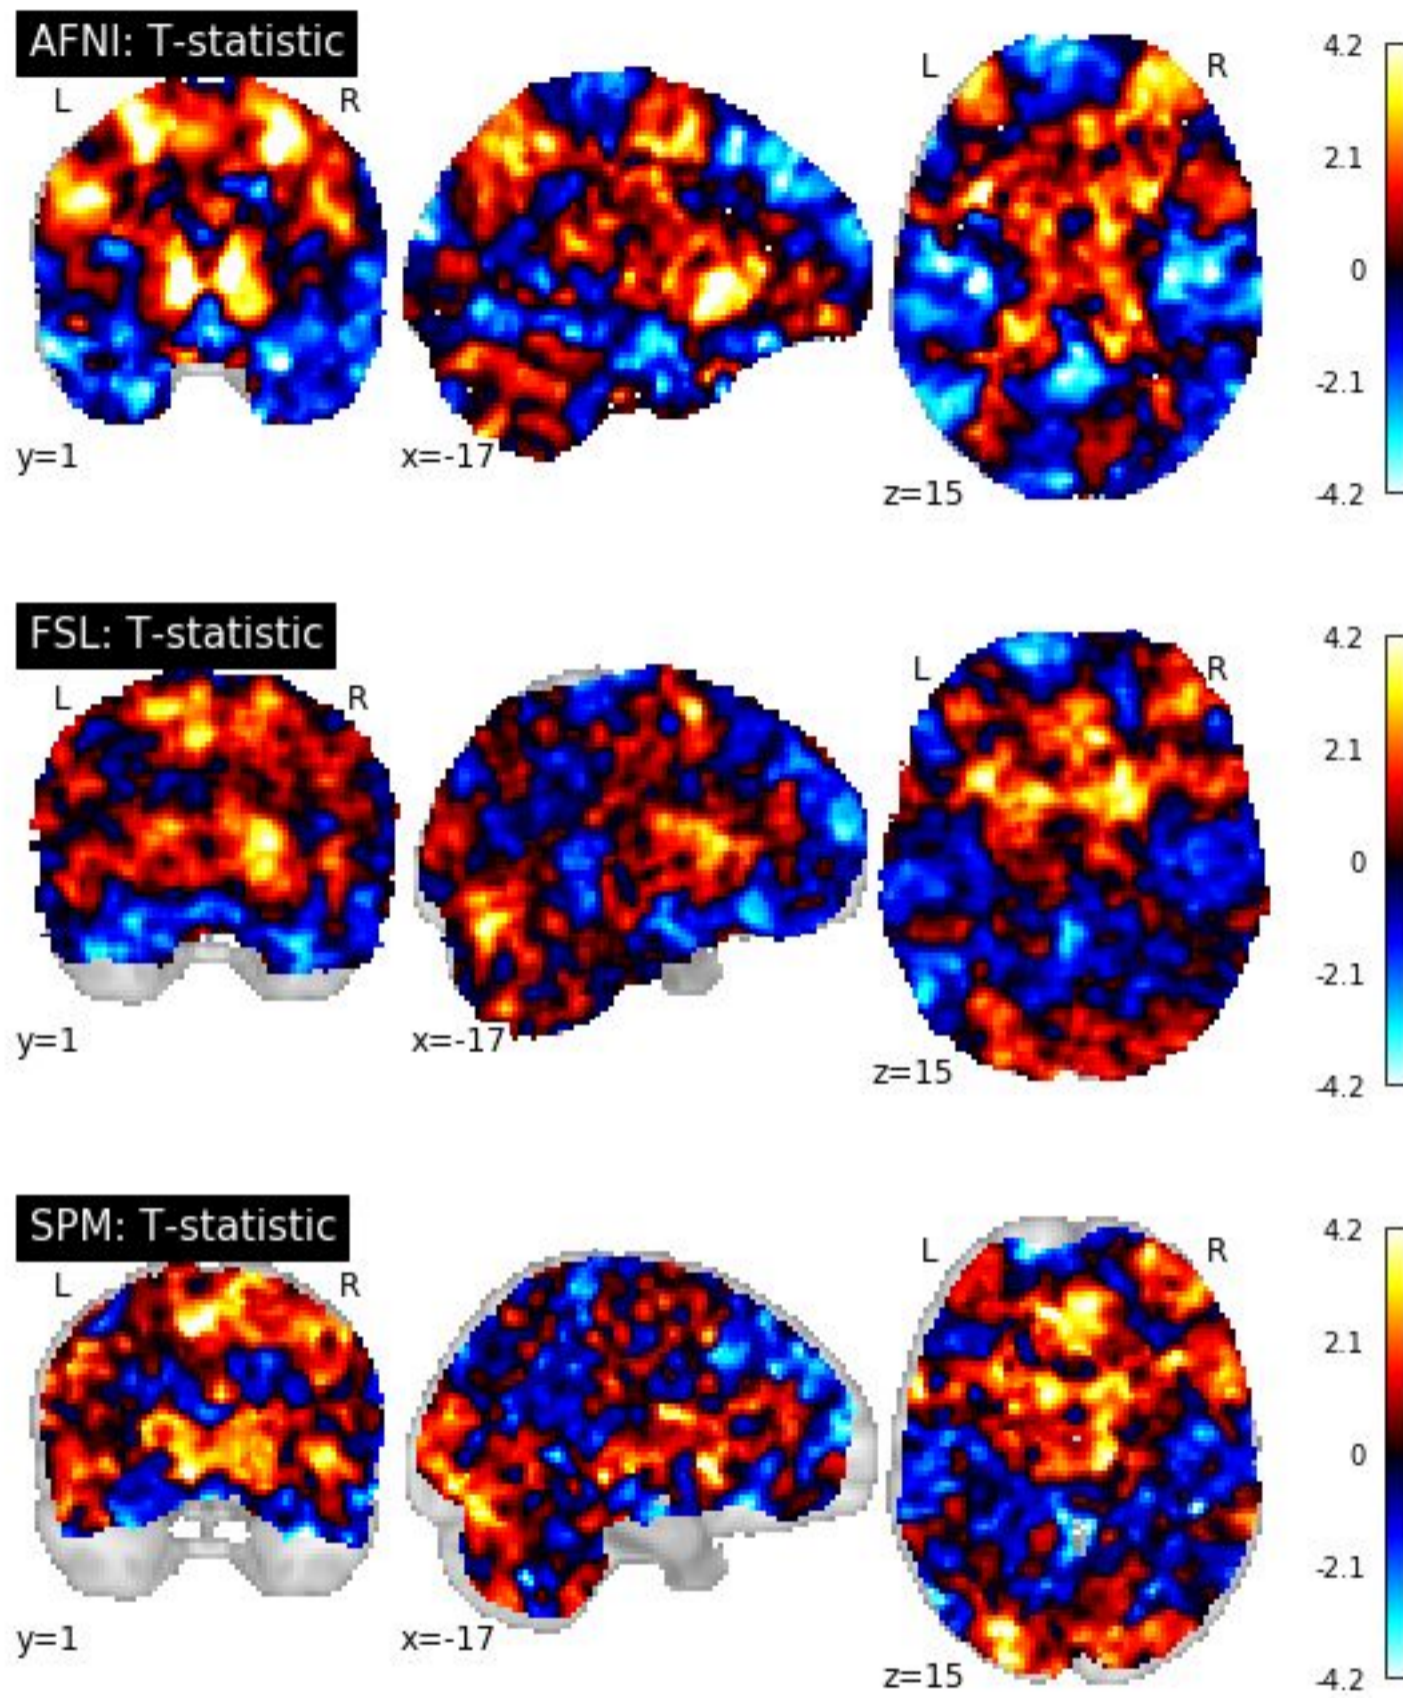

Figure S8. ds000001 Inter-Software Comparison, T-Statistic Maps from Permutation

**AFNI: Permutation T-statistic**

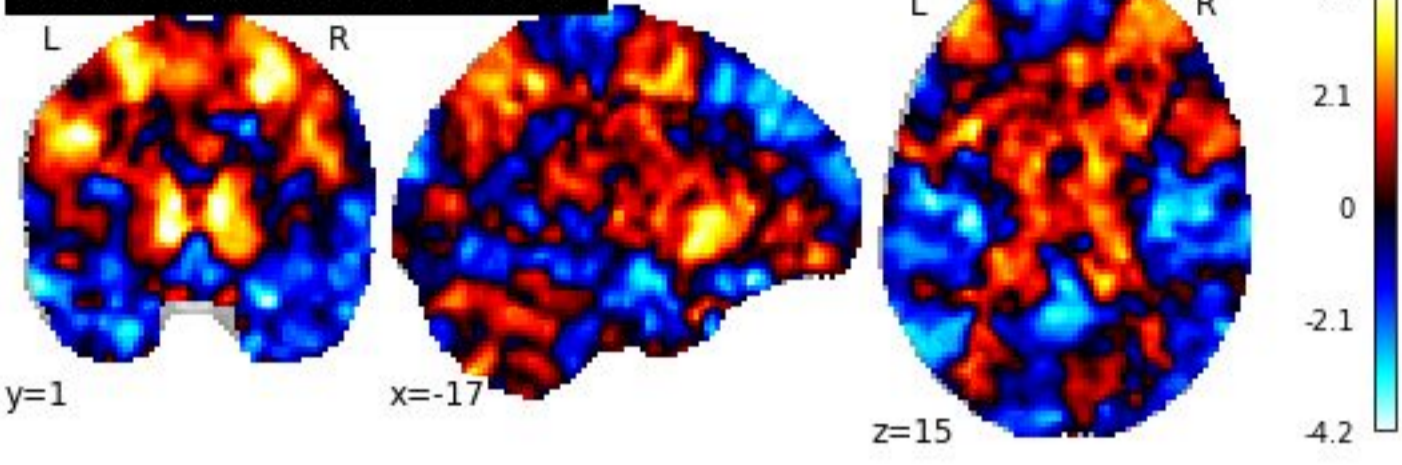

**FSL: Permutation T-statistic**

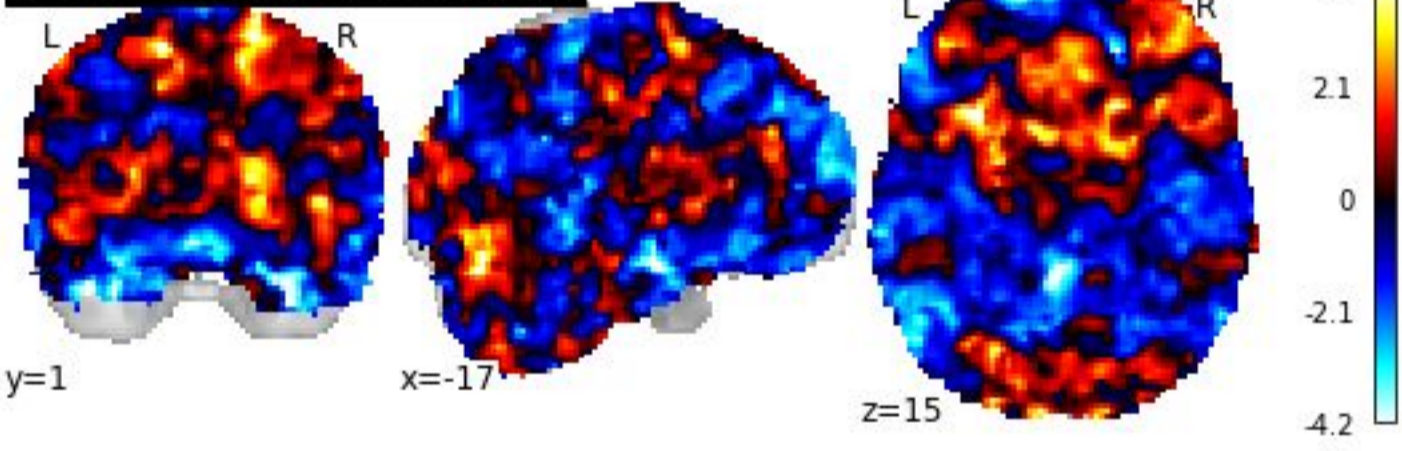

**SPM: Permutation T-statistic**

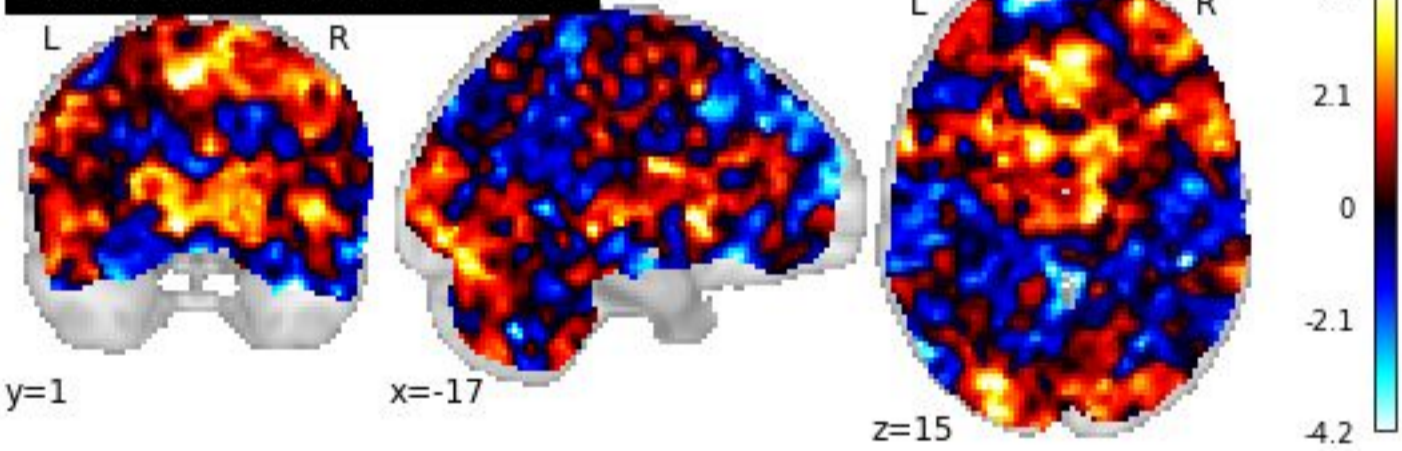



Figure S9. ds000109 Inter-Software Comparison, T-Statistic Maps

**AFNI: T-statistic**

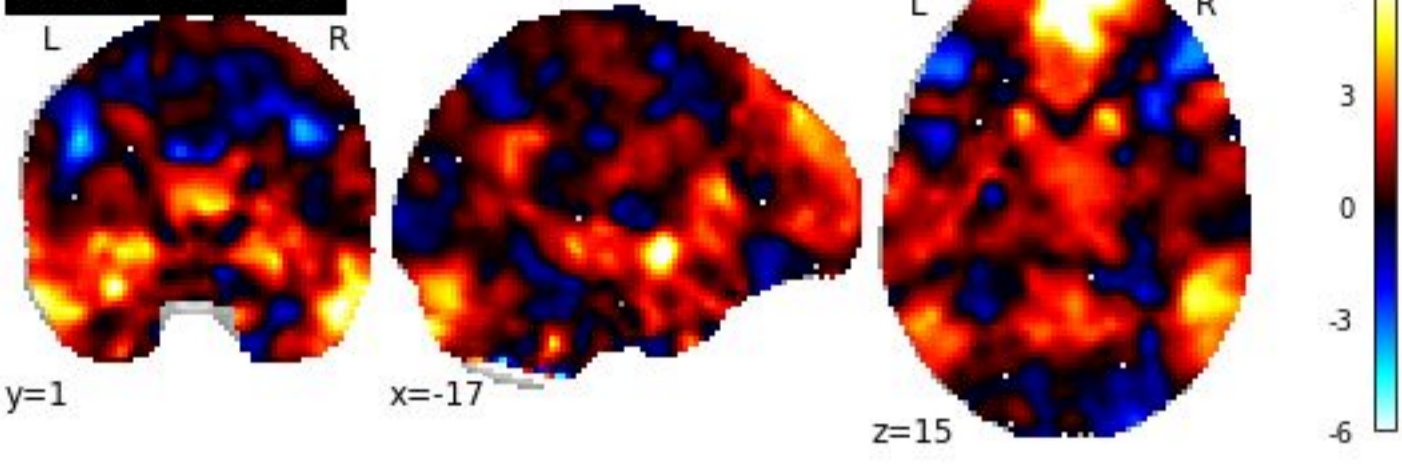

**FSL: T-statistic**

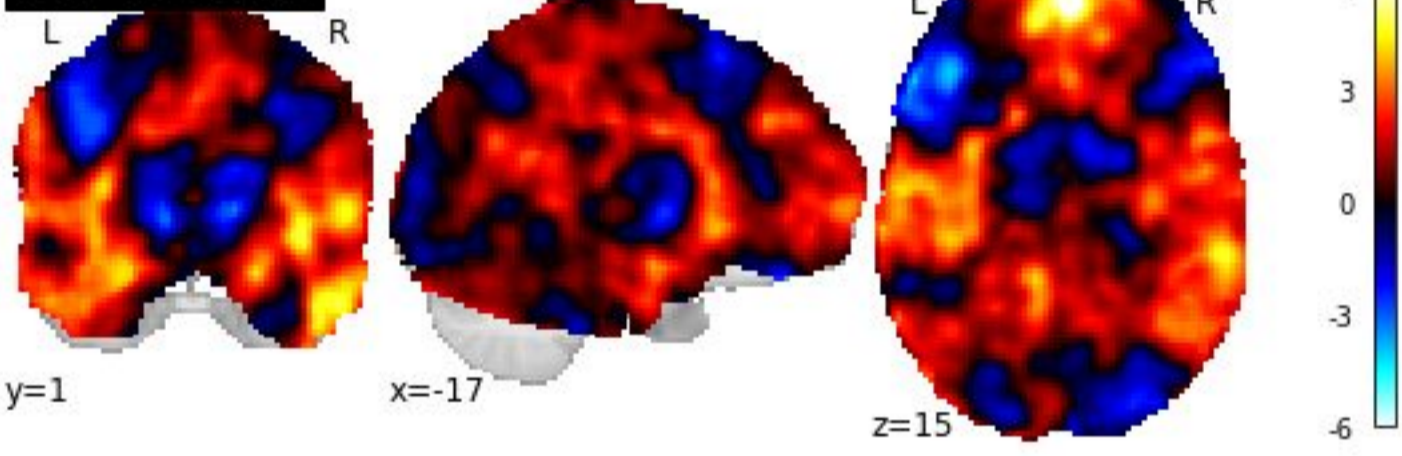

**SPM: T-statistic**

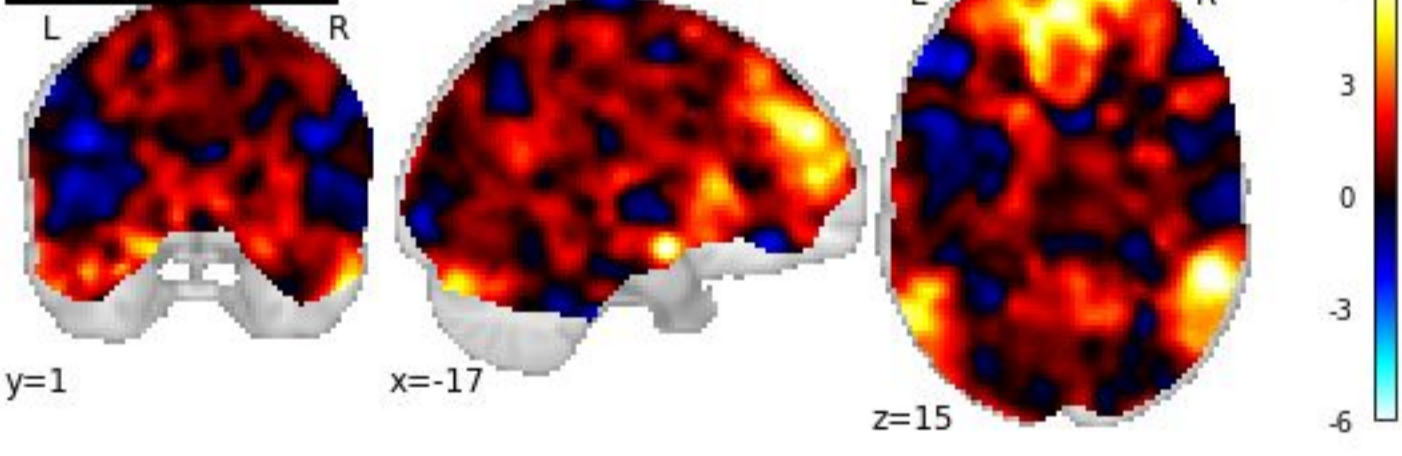

Figure S10. ds000109 Inter-Software Comparison, T-Statistic Maps from Permutation

**AFNI: Permutation T-statistic**

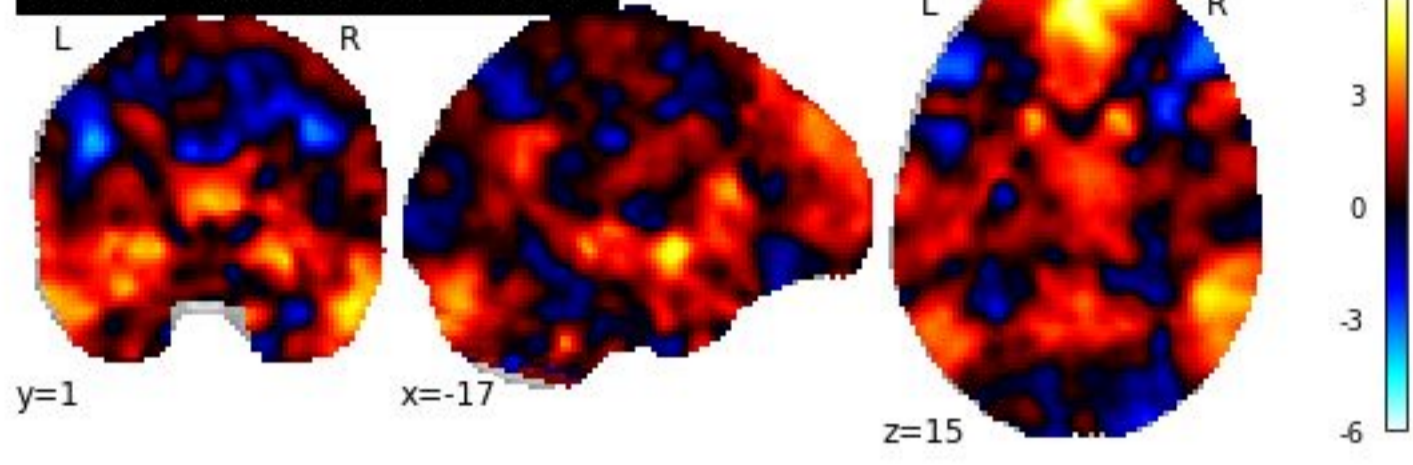

**FSL: Permutation T-statistic**

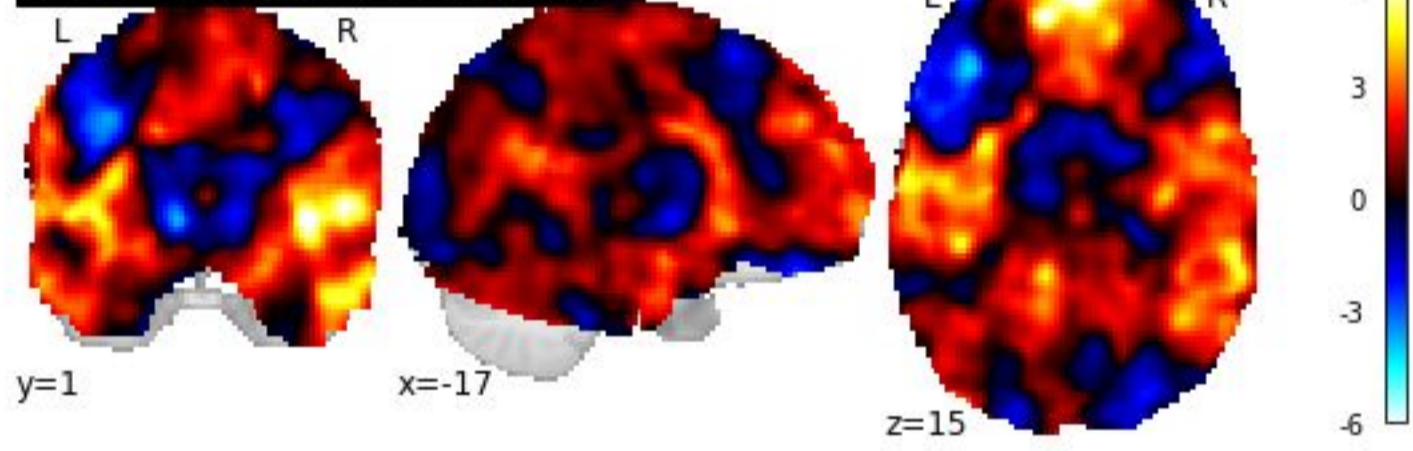

**SPM: Permutation T-statistic**

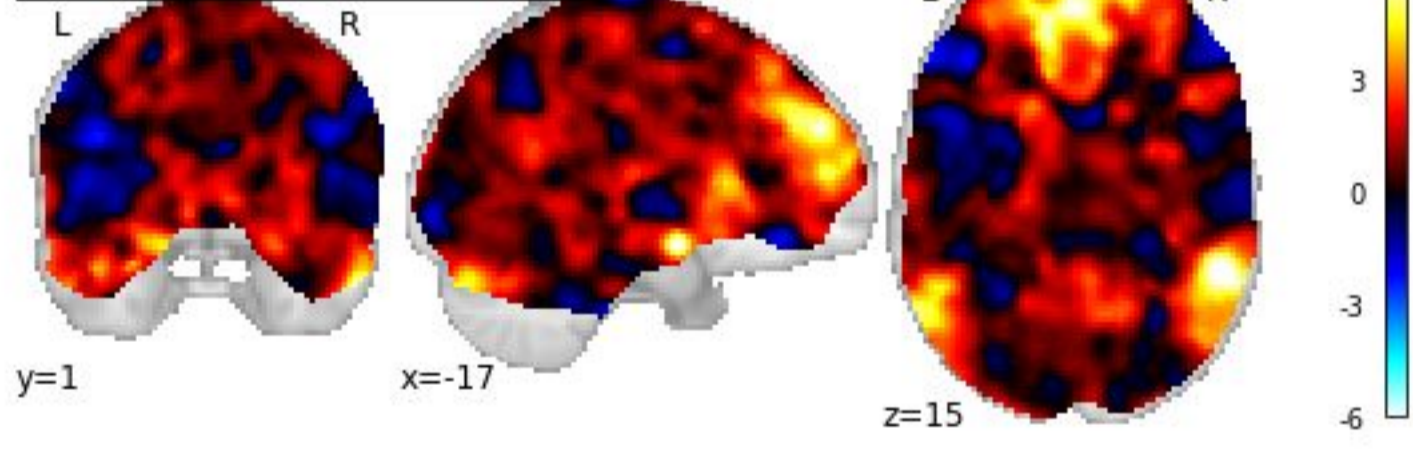

Figure S11. ds120 Inter-Software Comparison, F-Statistic Maps

**AFNI: F-statistic**

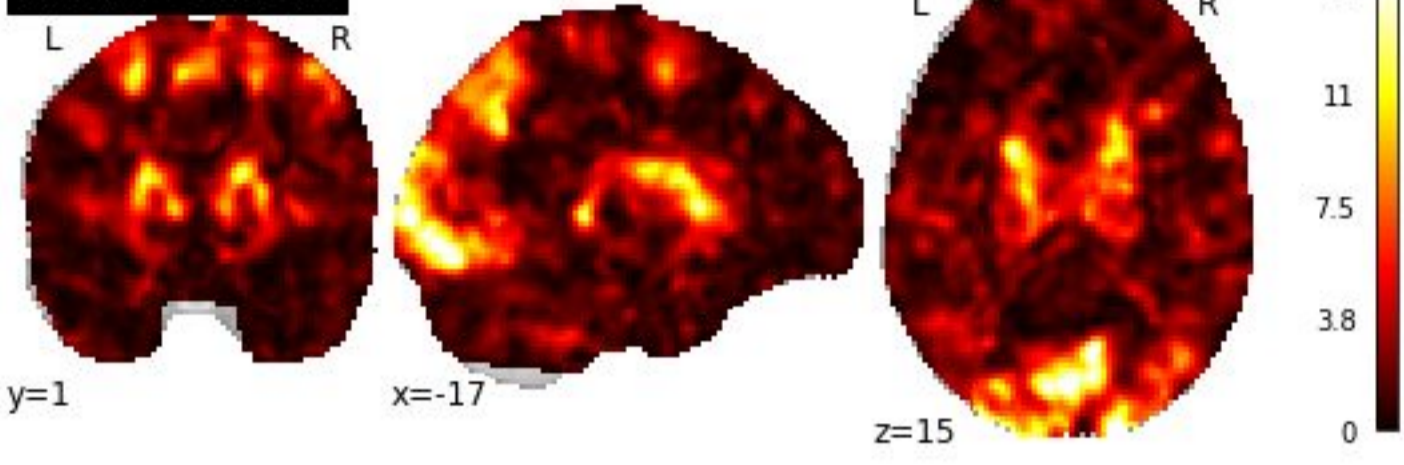

**SPM: F-statistic**

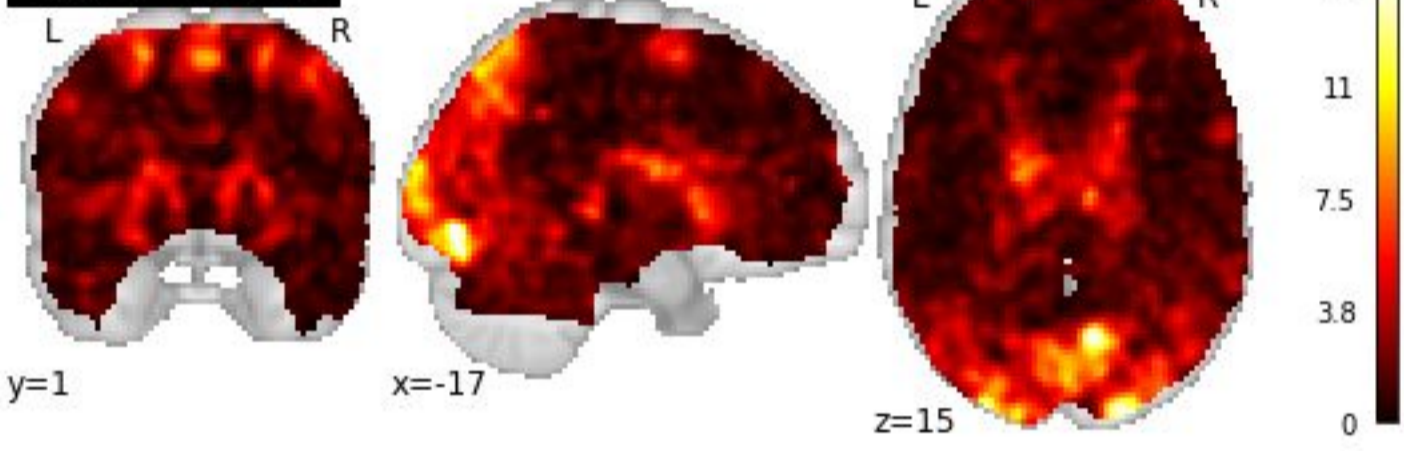

Figure S12. ds000120 Inter-Software Comparison, Euler Characteristic Curves for F-Statistic Maps

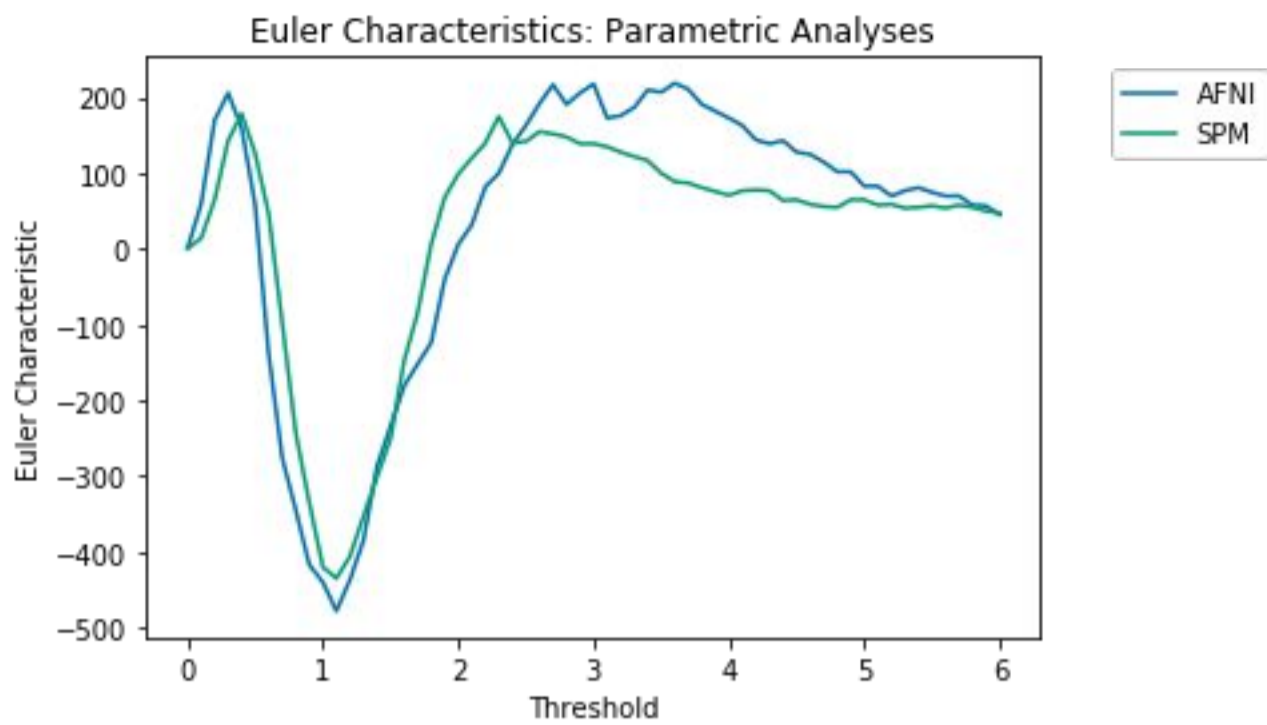

Supplement: Supplementary file [file 285585-1.pdf]
